# Supplementary material for: Azolium hydrogen carbonates and azolium carboxylates as organic pre-catalysts for N-heterocyclic carbene-catalysed group transfer and ring-opening polymerisations
Source: Royal Society of Chemistry journal article supplement (doi:10.1039/c2py20915b), 2013-01-01
Supplement: c2py20915b.pdf [file c2py20915b.pdf]

Azolium Hydrogen Carbonates and Azolium Carboxylates as Organic  
Pre-catalysts for *N*-Heterocyclic Carbene-Catalyzed Group Transfer  
and Ring-Opening Polymerizations

SUPPORTING INFORMATION

Maréva Fèvre,<sup>1,2</sup> Joan Vignolle,<sup>1,2</sup> and Daniel Taton<sup>1,2\*</sup>

<sup>1</sup>*CNRS, Laboratoire de Chimie des Polymères Organiques, UMR 5629, F-33600 Pessac  
(France)*

<sup>2</sup>*Univ. Bordeaux, Laboratoire de Chimie des Polymères Organiques, UMR 5629, F-33600  
Pessac (France)*

Corresponding author : E-mail : [taton@enscbp.fr](mailto:taton@enscbp.fr); Fax : +33 (0)540008487

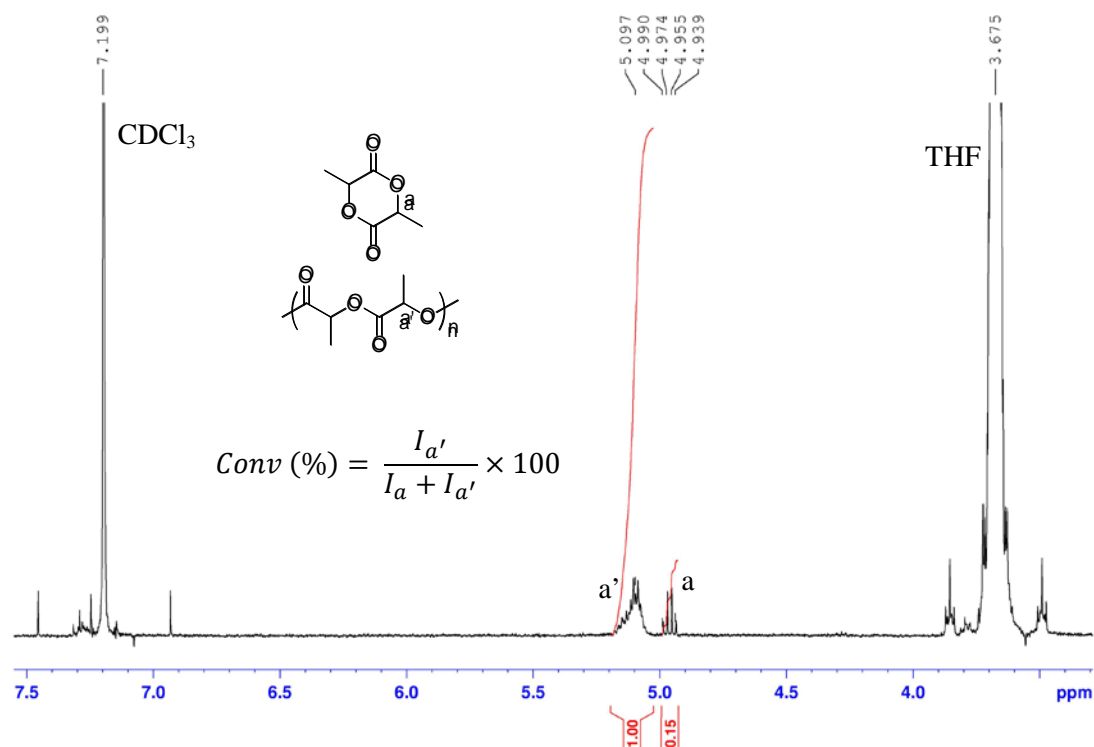

Figure S1. <sup>1</sup>H NMR spectrum in CDCl<sub>3</sub> of the crude product formed by ring opening polymerization of lactide in THF, calculation of the conversion is shown in the inserted formula.

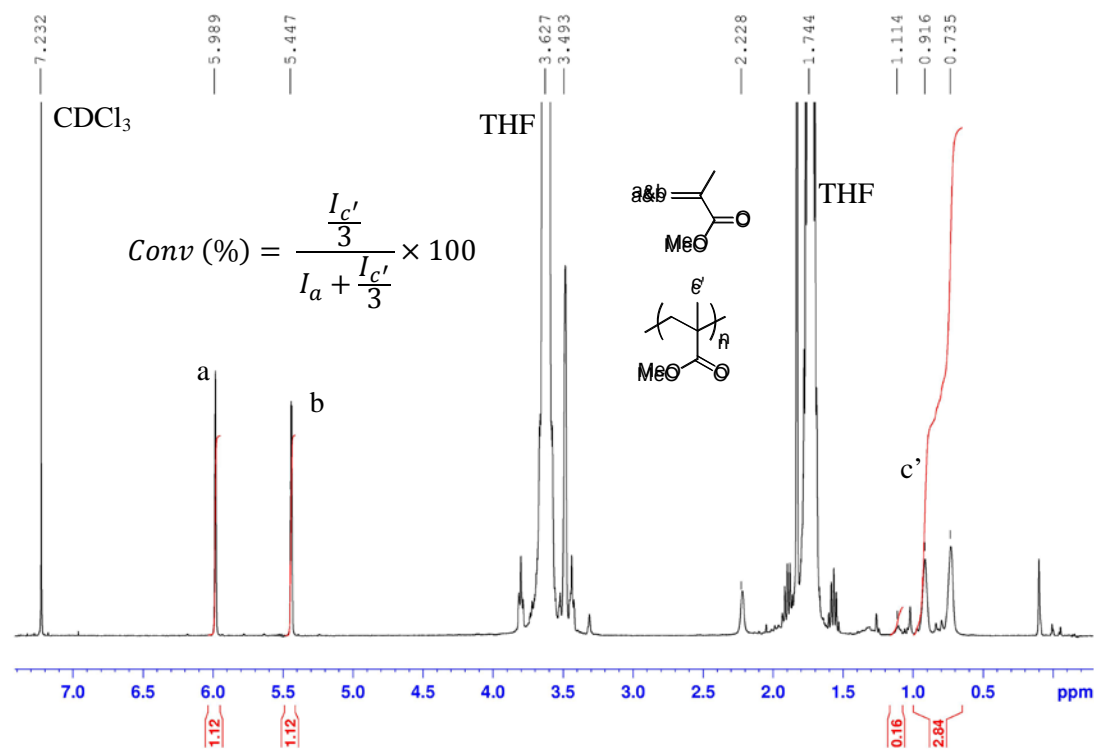

Figure S2. <sup>1</sup>H NMR spectrum in CDCl<sub>3</sub> of the crude product formed by group transfer polymerization of methyl methacrylate in THF, calculation of the conversion is shown in the inserted formula.

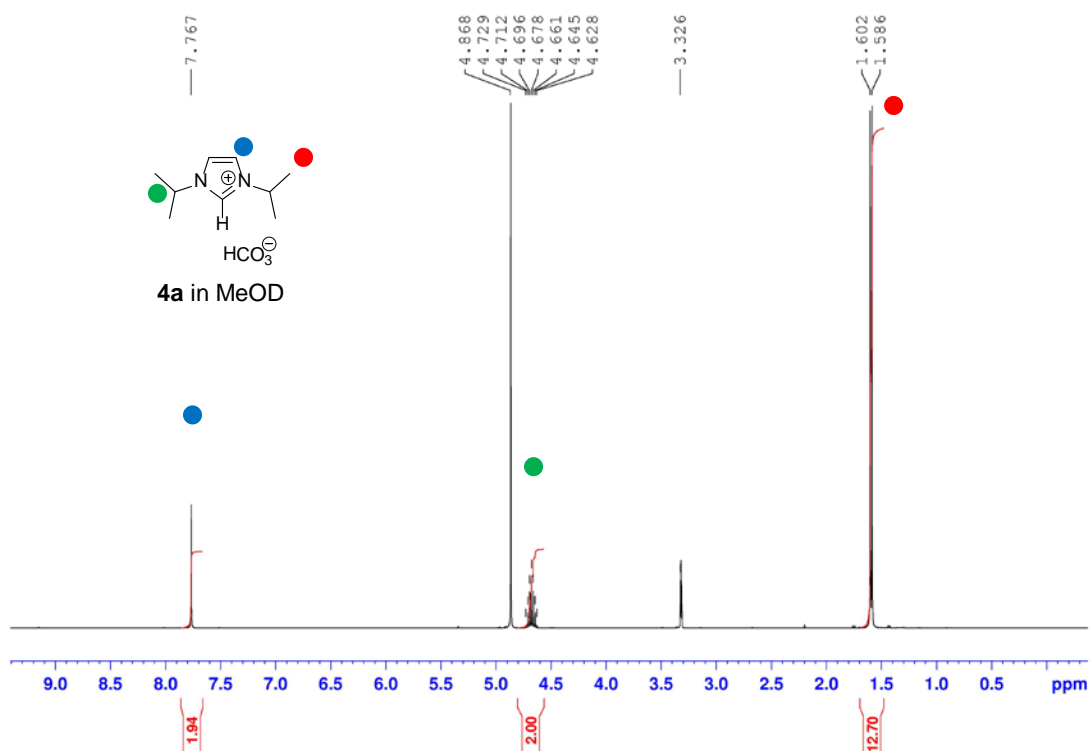

Figure S3.  $^1\text{H}$  NMR spectrum of compound **4a** in MeOD.

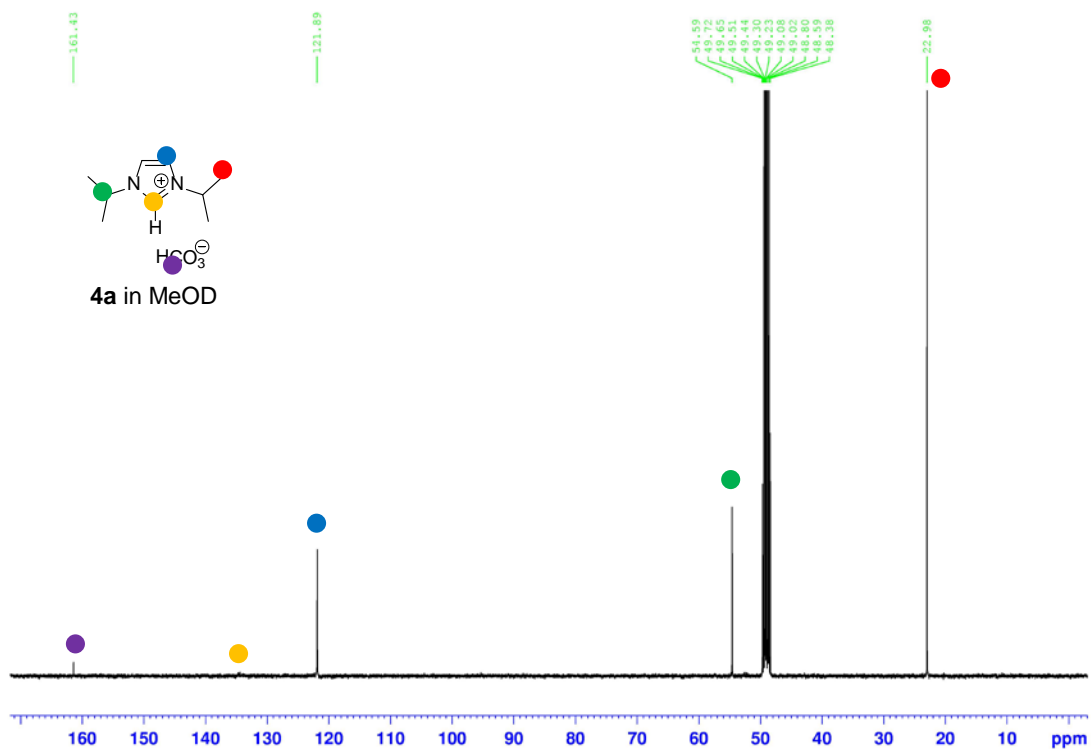

Figure S4.  $^{13}\text{C}$  NMR spectrum of compound **4a** in MeOD.

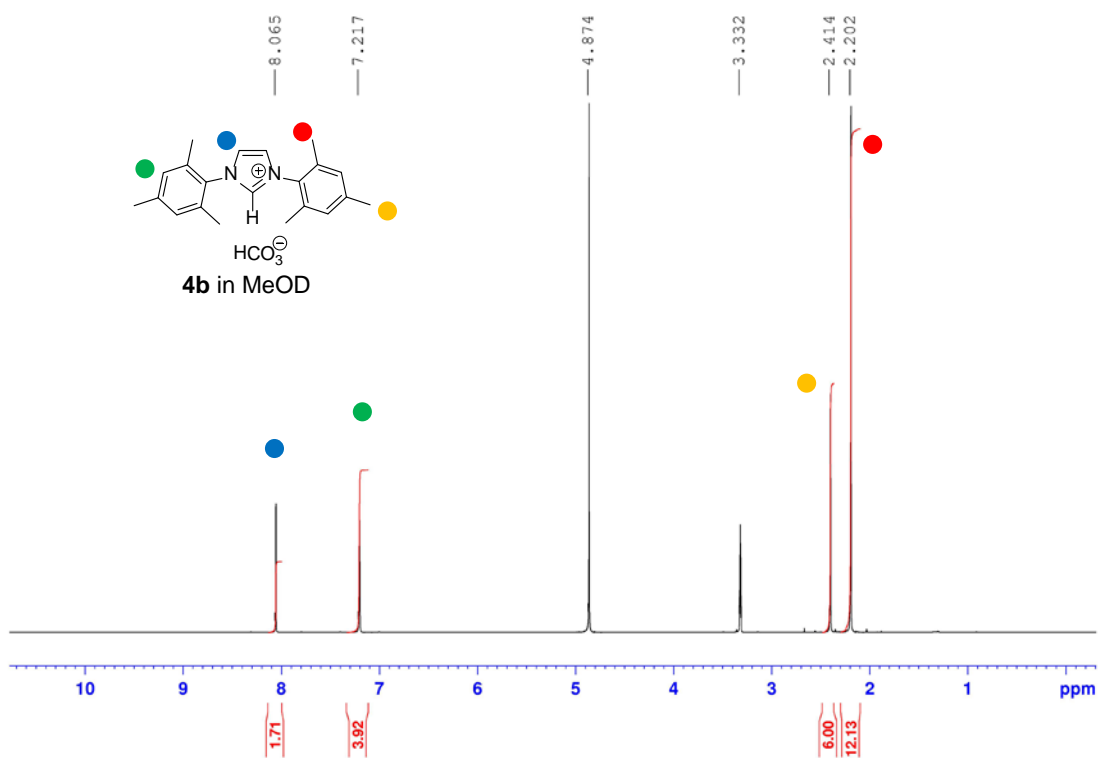

Figure S5.  $^1\text{H}$  NMR spectrum of compound **4b** in MeOD.

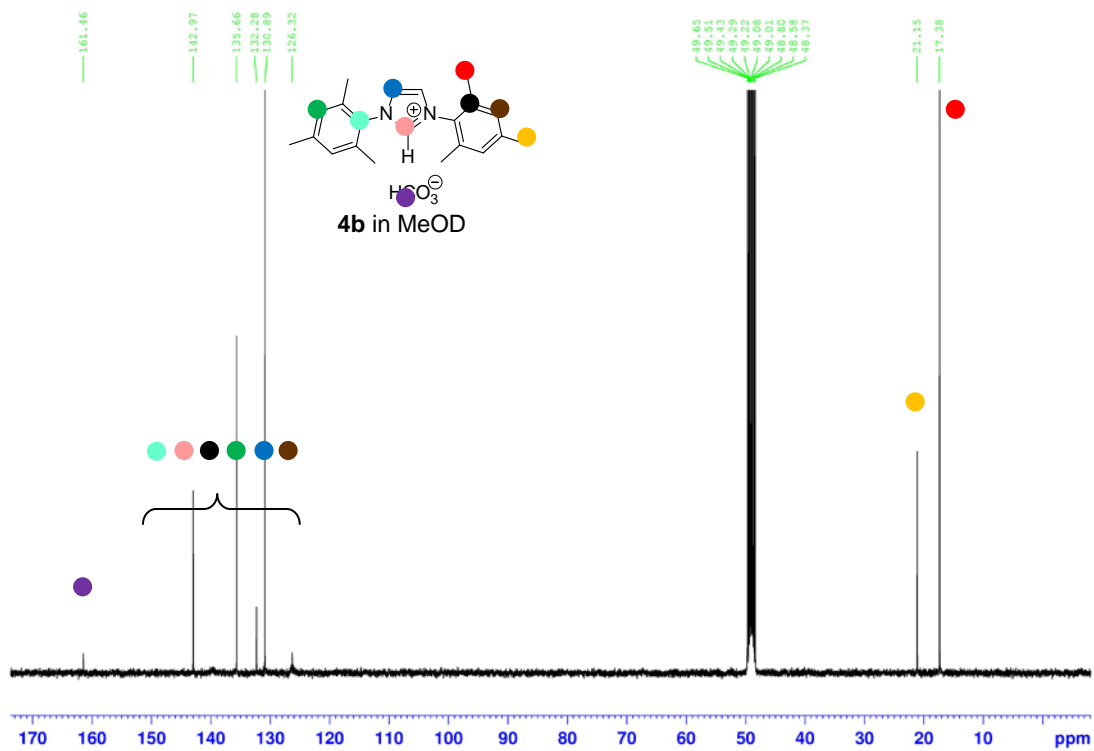

Figure S6.  $^{13}\text{C}$  NMR spectrum of compound **4b** in MeOD.

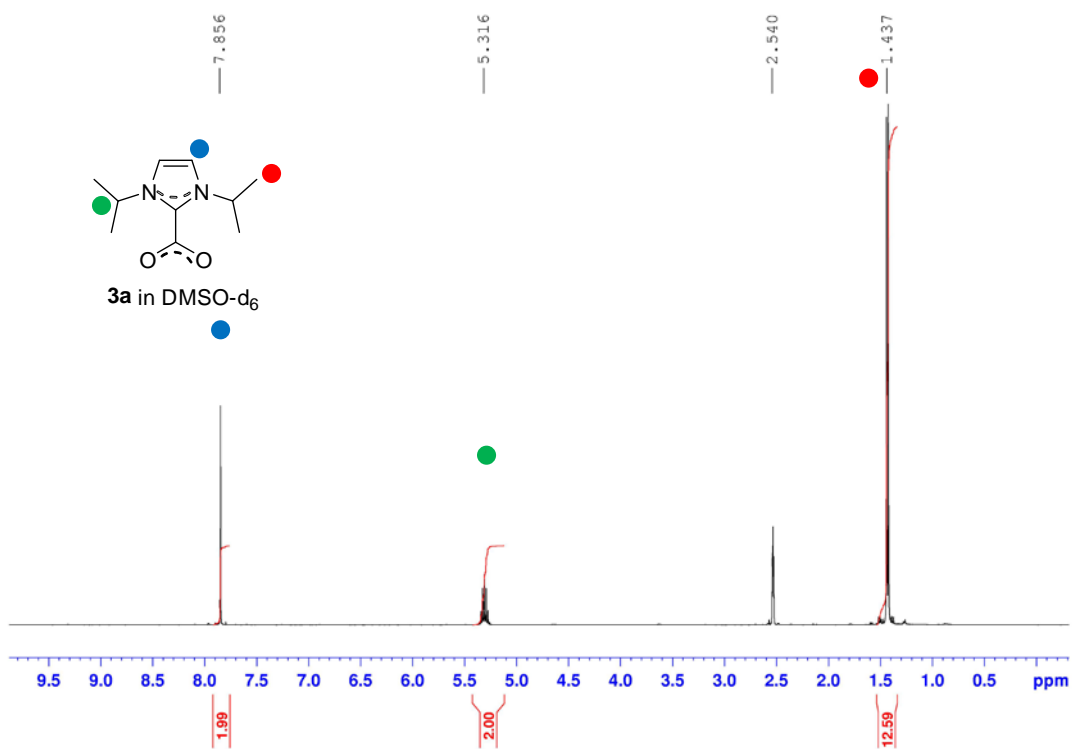

Figure S7. <sup>1</sup>H NMR spectrum of compound **3a** in DMSO-d<sub>6</sub>.

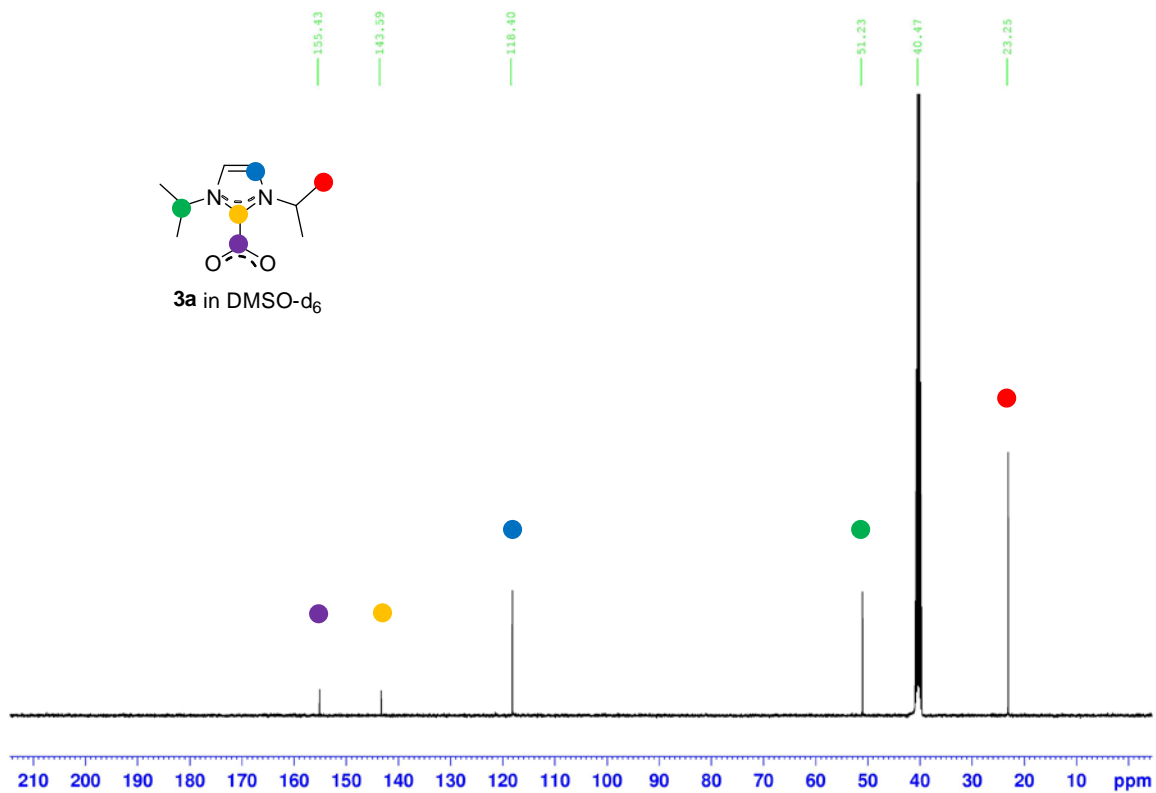

Figure S8. <sup>13</sup>C NMR spectrum of compound **3a** in DMSO-d<sub>6</sub>.

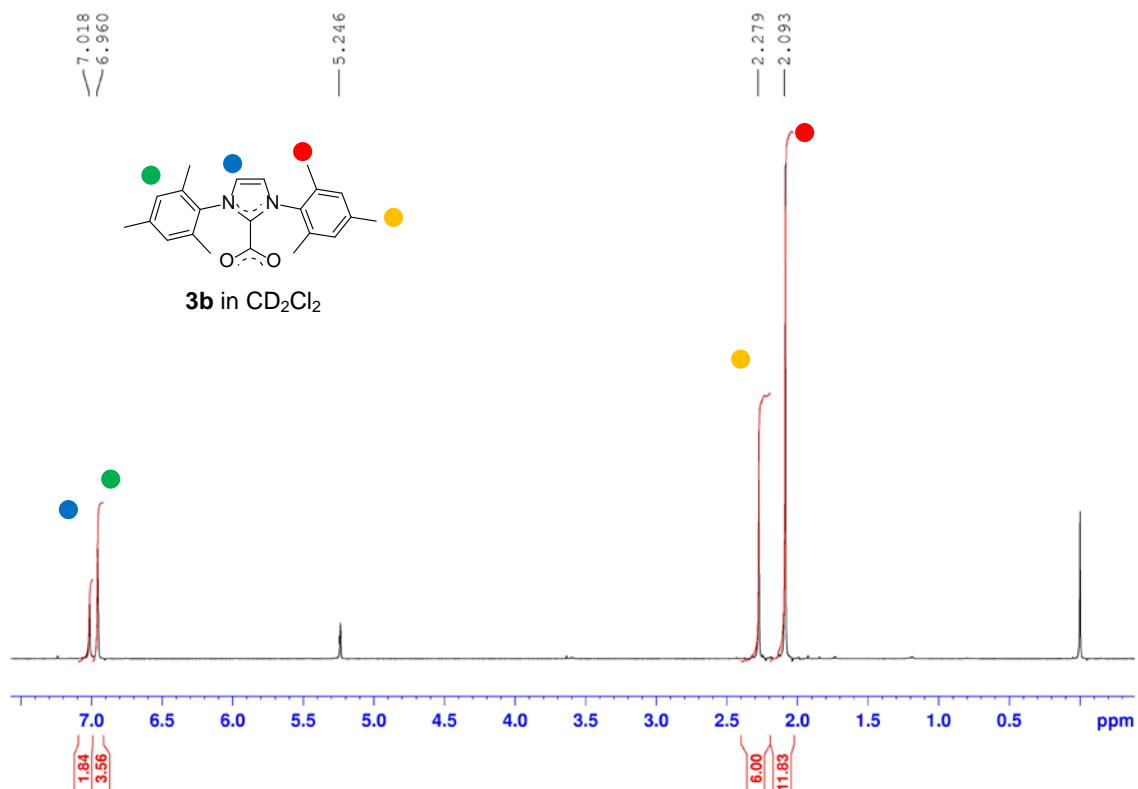

Figure S9.  $^1\text{H}$  NMR spectrum of compound **3b** in  $\text{CD}_2\text{Cl}_2$ .

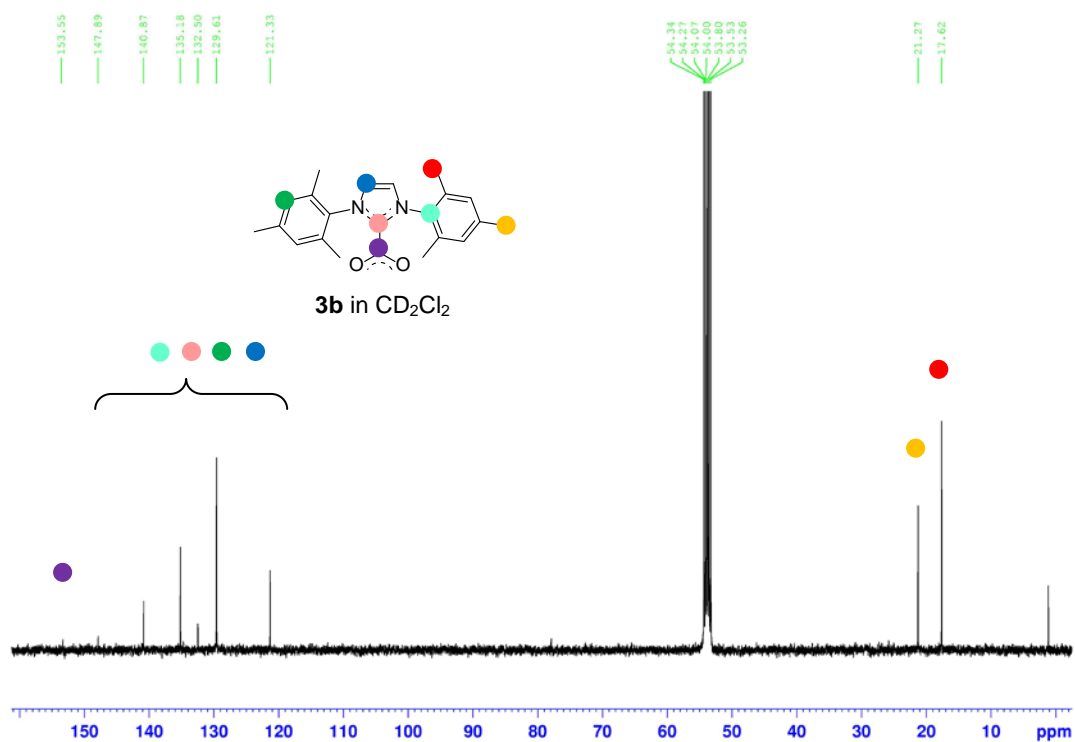

Figure S10.  $^{13}\text{C}$  NMR spectrum of compound **3b** in  $\text{CD}_2\text{Cl}_2$ .
